# Supplementary material for: Combined Effects of Flow Diverting Strategies and Parent Artery Curvature on Aneurysmal Hemodynamics: A CFD Study
Source: PubMed Central journal article supplement (PMC4580450; doi:10.1371/journal.pone.0138648), 2015-09-23
Supplement: pone.0138648.s001.pdf [file pone.0138648.s001.pdf]

**S1 Table. Quantitative hemodynamic results before and after each types of flow diverting methods for each vessels' curvature**

|      | flow diverting methods                  | mean pressure (Pa) | normalized mean WSS | RRT    | inflow volume rate (cm <sup>3</sup> /s) |
|------|-----------------------------------------|--------------------|---------------------|--------|-----------------------------------------|
| 60°  | pre-treated                             | 115.26             | 0.22                | 2.28   | 2.96                                    |
|      | single FD                               | 111.72             | 0.21                | 14.09  | 0.58                                    |
|      | overlapped FD with 50% overlapped rate  | 108.16             | 0.16                | 117.16 | 0.20                                    |
|      | overlapped FD with 25% overlapped rate  | 108.98             | 0.17                | 47.57  | 0.25                                    |
|      | single FD with 5% packing density coil  | 107.57             | 0.12                | 24.17  | 0.70                                    |
|      | single FD with 10% packing density coil | 107.49             | 0.13                | 23.53  | 0.72                                    |
| 90°  | pre-treated                             | 136.49             | 0.23                | 1.84   | 3.73                                    |
|      | single FD                               | 129.49             | 0.20                | 12.50  | 0.69                                    |
|      | overlapped FD with 50% overlapped rate  | 125.28             | 0.17                | 74.18  | 0.24                                    |
|      | overlapped FD with 25% overlapped rate  | 127.20             | 0.17                | 47.38  | 0.29                                    |
|      | single FD with 5% packing density coil  | 125.70             | 0.11                | 20.66  | 0.82                                    |
|      | single FD with 10% packing density coil | 125.30             | 0.11                | 20.17  | 0.85                                    |
| 120° | pre-treated                             | 148.05             | 0.20                | 1.72   | 4.35                                    |
|      | single FD                               | 143.88             | 0.21                | 9.15   | 0.85                                    |
|      | overlapped FD with 50% overlapped rate  | 140.23             | 0.16                | 47.90  | 0.30                                    |
|      | overlapped FD with 25% overlapped rate  | 140.61             | 0.16                | 31.05  | 0.40                                    |
|      | single FD with 5% packing density coil  | 142.61             | 0.12                | 15.67  | 0.99                                    |
|      | single FD with 10% packing density coil | 141.66             | 0.12                | 15.39  | 1.02                                    |
| 180° | pre-treated                             | 187.65             | 0.26                | 1.09   | 5.06                                    |
|      | single FD                               | 175.99             | 0.25                | 4.39   | 1.33                                    |
|      | overlapped FD with 50% overlapped rate  | 170.08             | 0.18                | 24.14  | 0.47                                    |
|      | overlapped FD with 25% overlapped rate  | 171.58             | 0.19                | 13.23  | 0.70                                    |
|      | single FD with 5% packing density coil  | 172.92             | 0.14                | 7.50   | 1.37                                    |
|      | single FD with 10% packing density coil | 172.05             | 0.14                | 7.47   | 1.40                                    |
